# Supplementary material
Source: MDPI journal article supplement (https://www.mdpi.com/2073-4395/13/7/1679)
Supplement: s1 [file s1]

## Supporting Information for:

**Table S1**

The irrigation schedule in the growing seasons of 2019, 2020, and 2021.

| Growth stage of cotton           | 2019     | DAS | Amount (mm) | 2020     | DAS | Amount (mm) | 2021     | DAS | Amount (mm) |
|----------------------------------|----------|-----|-------------|----------|-----|-------------|----------|-----|-------------|
| Sowing data                      | 9April   | 0   | 0           | 13April  | 0   | 0           | 8April   | 0   | 0           |
| Seedling and Squaring stage      | 14June   | 68  | 29.36       | 16June   | 70  | 28.33       | 14June   | 68  | 29.29       |
|                                  | 22June   | 76  | 26.33       | 27June   | 78  | 31.90       | 22June   | 76  | 28.33       |
|                                  | 30July   | 84  | 32.23       | 5July    | 86  | 36.19       | 30July   | 84  | 31.43       |
| Flowering and boll-setting stage | 8July    | 93  | 43.23       | 13July   | 94  | 41.67       | 7July    | 92  | 43.81       |
|                                  | 16July   | 100 | 38.14       | 21July   | 102 | 39.76       | 16July   | 100 | 37.14       |
|                                  | 24July   | 108 | 41.94       | 29July   | 110 | 41.19       | 24July   | 108 | 42.14       |
| Bolls and boll-opening stage     | 1August  | 116 | 39.69       | 6August  | 118 | 37.62       | 1August  | 116 | 41.67       |
|                                  | 9August  | 124 | 36.65       | 14August | 126 | 36.98       | 9August  | 124 | 35.95       |
|                                  | 16August | 132 | 21.48       | 22August | 134 | 20.24       | 16August | 132 | 20.48       |
|                                  | 25August | 140 | 20.57       | 30August | 142 | 21.19       | 25August | 140 | 18.57       |
| Total                            | -        | -   | 329.62      | -        | -   | 335.07      | -        | -   | 328.81      |

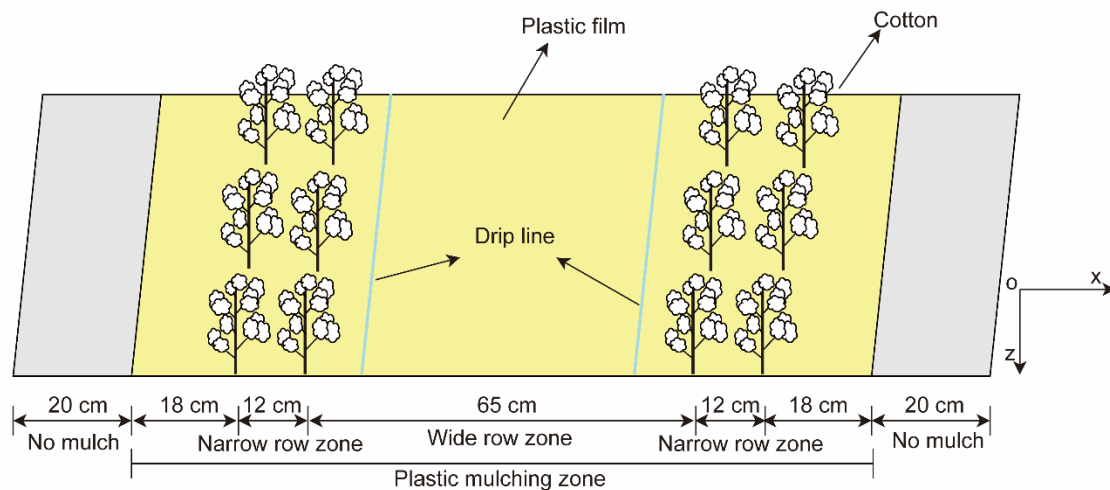

**Figure S1.** Schematic diagram of cotton planting.

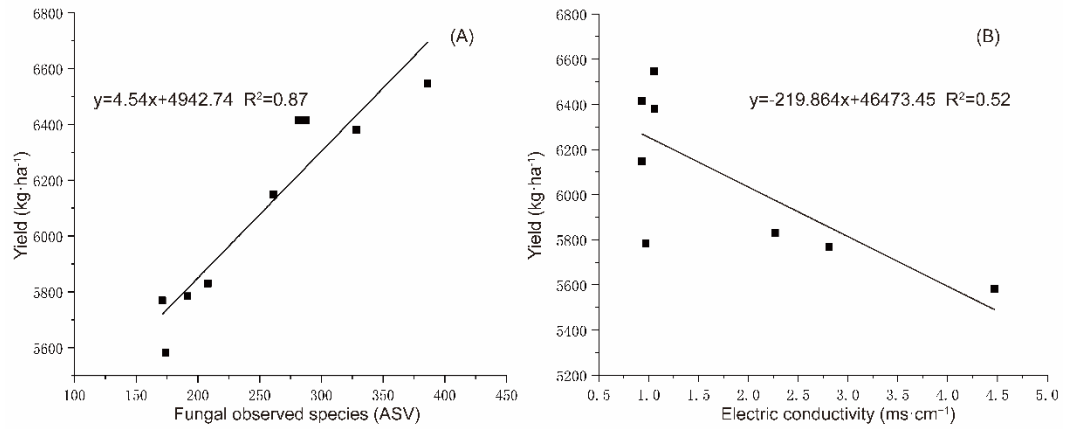

**Figure S2.** Results of the correlation analysis between cotton and yield fungal observed species (A) and EC (B).

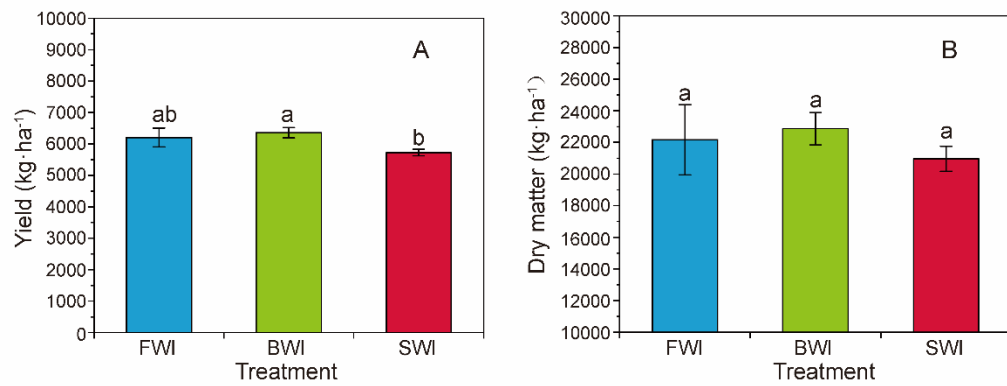

**Figure S3.** Comparison of seed cotton yield (A) and dry matter (B) between the fresh (FWI), brackish (BWI), and salt (SWI) irrigation water treatments. Error bars represent standard errors. The different lower-case letters indicate significant differences among treatments ( $p < 0.05$ ; Fisher's LSD Test).
